# Supplementary material for: Quantitative Analysis of Bioactive Phenanthrenes in Dioscorea batatas Decne Peel, a Discarded Biomass from Postharvest Processing
Source: PubMed Central journal article supplement (PMC6912652; doi:10.3390/antiox8110541), 2019-11-10
Supplement: antioxidants-08-00541-s001.pdf [file antioxidants-08-00541-s001.pdf]

## Supporting Information

# Quantitative Analysis of Bioactive Phenanthrenes in *Dioscorea batatas* Decne Peel, a Discarded Biomass from Postharvest Processing

Minyoul Kim,<sup>1,2,†</sup> Myeong Ju Gu,<sup>1,†</sup> Joon-Goo Lee,<sup>3</sup> Jungwook Chin,<sup>4</sup> Jong-Sup Bae,<sup>5,\*</sup> and Dongyup Hahn,<sup>1,2,6,\*</sup>

<sup>1</sup> School of Food Science and Biotechnology, College of Agriculture and Life Sciences, Kyungpook National University, Daegu 41566, Republic of Korea

<sup>2</sup> Department of Integrative Biology, Kyungpook National University, Daegu 41566, Republic of Korea

<sup>3</sup> Food Standard Division, Ministry of Food and Drug Safety, Cheongju 28159, Republic of Korea

<sup>4</sup> New Drug Development Center, Daegu-Gyeongbuk Medical Innovation Foundation, Daegu 41061, Republic of Korea

<sup>5</sup> College of Pharmacy, CMRI, Research Institute of Pharmaceutical Sciences, BK21 Plus KNU Multi-Omics based Creative Drug Research Team, Kyungpook National University, Daegu 41566, Republic of Korea

<sup>6</sup> Institute of Agricultural Science and Technology, College of Agriculture and Life Sciences, Kyungpook National University, Daegu 41566, Republic of Korea

\* Correspondence: [dohahn@knu.ac.kr](mailto:dohahn@knu.ac.kr) (D.H.); [baejs@knu.ac.kr](mailto:baejs@knu.ac.kr) (J.-S.B.)

†These authors contributed equally to this work

## Contents

- 1) **Figure S1.**  $^1\text{H}$  and  $^{13}\text{C}$  NMR spectra of compound **1** ( $^1\text{H}$ -500MHz,  $^{13}\text{C}$ -125MHz, Acetone- $d_6$ )
- 2) **Figure S2.**  $^1\text{H}$  and  $^{13}\text{C}$  NMR spectra of compound **2** ( $^1\text{H}$ -500MHz,  $^{13}\text{C}$ -125MHz, Acetone- $d_6$ )
- 3) **Figure S3.**  $^1\text{H}$  and  $^{13}\text{C}$  NMR spectra of compound **3** ( $^1\text{H}$ -500MHz,  $^{13}\text{C}$ -125MHz, Acetone- $d_6$ )
- 4) **Table S1.** DPPH radical scavenging activity of compounds **1-3**, DBP and DBF extracts.
- 5) **Table S2.** ABTS+ radical scavenging activity of compounds **1-3**, DBP and DBF extracts.

Figure S1.  $^1\text{H}$  and  $^{13}\text{C}$  NMR spectra of compound 1 ( $^1\text{H}$ -500MHz,  $^{13}\text{C}$ -125MHz, Acetone- $d_6$ )

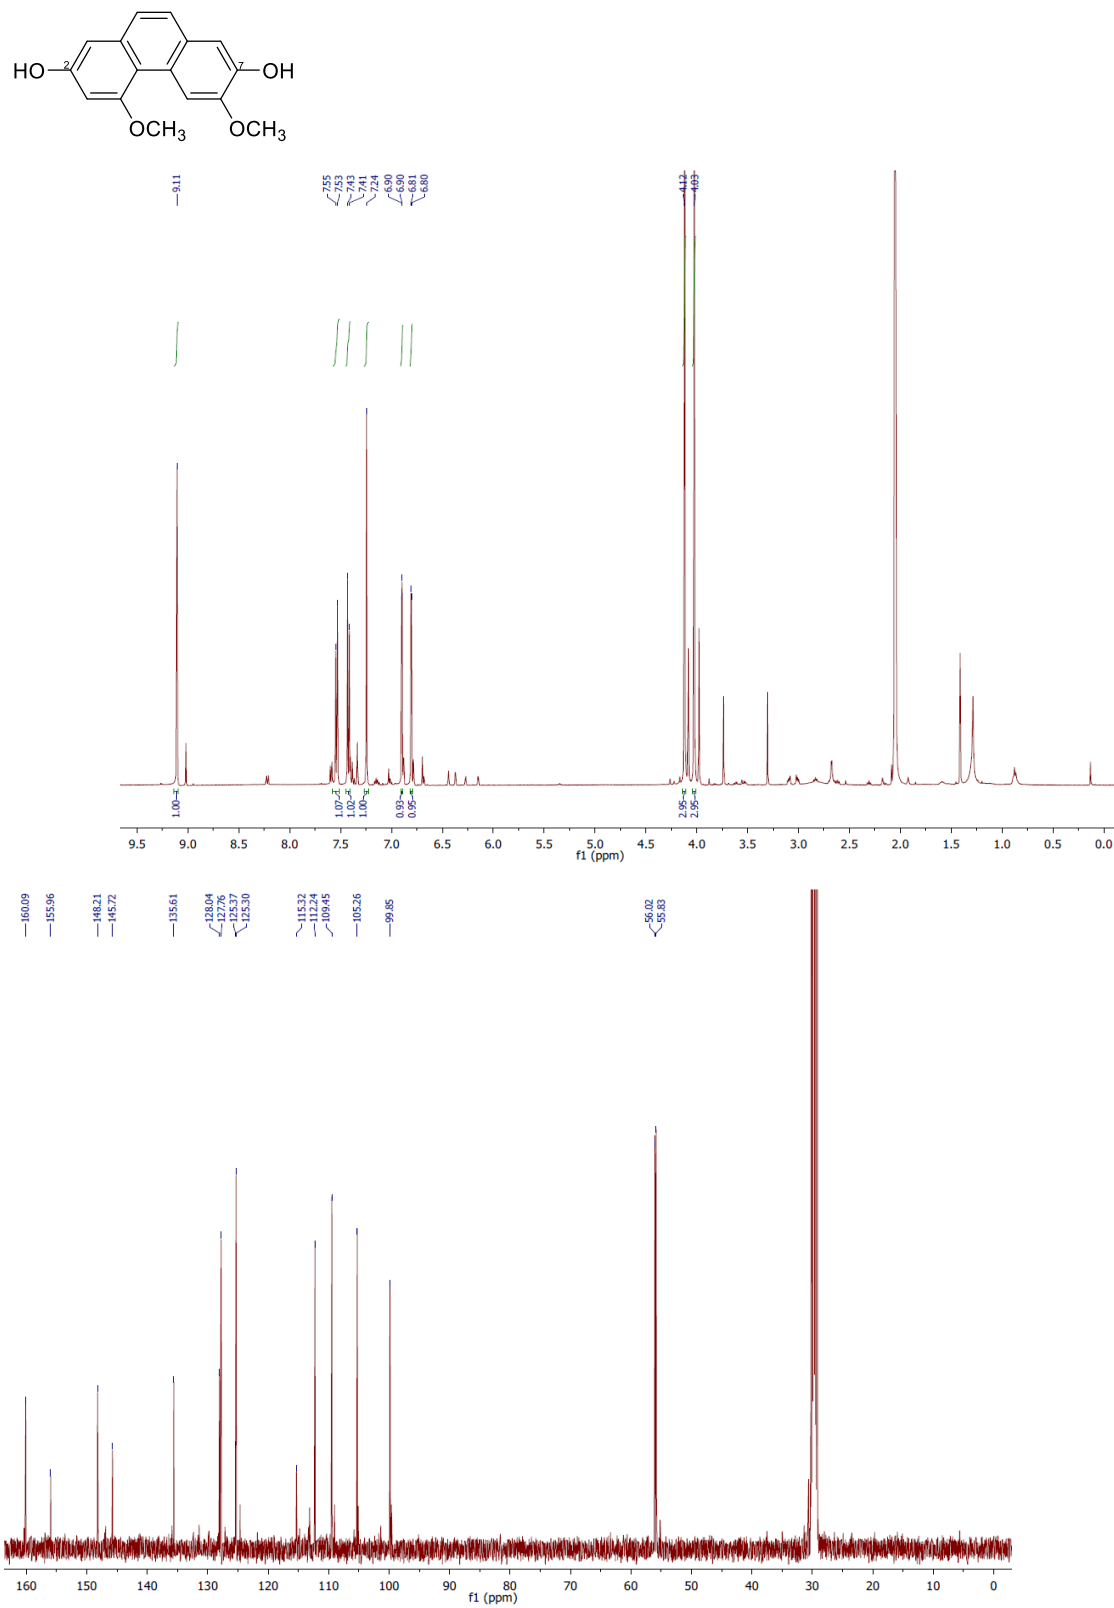

Figure S2.  $^1\text{H}$  and  $^{13}\text{C}$  NMR spectra of compound 2 ( $^1\text{H}$ -500MHz,  $^{13}\text{C}$ -125MHz, Acetone- $d_6$ )

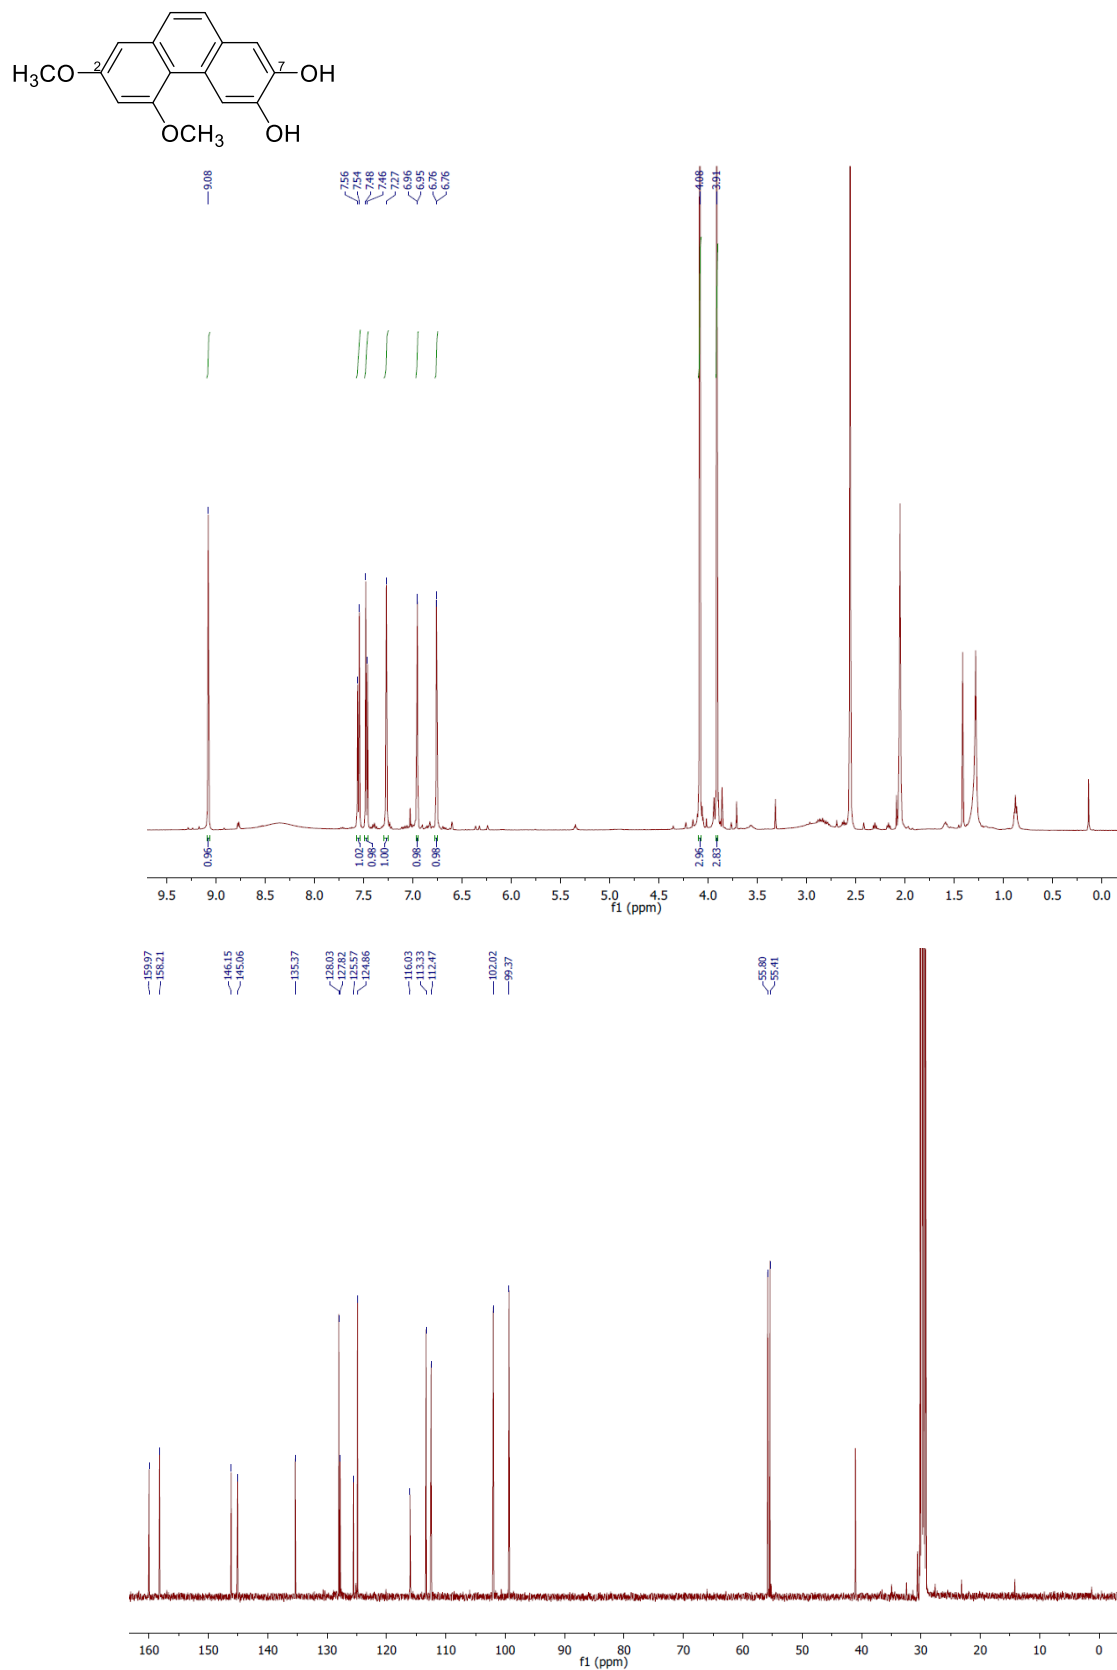

Figure S3.  $^1\text{H}$  and  $^{13}\text{C}$  NMR spectra of compound 3 ( $^1\text{H}$ -500MHz,  $^{13}\text{C}$ -125MHz,  $\text{DMSO-}d_6$ )

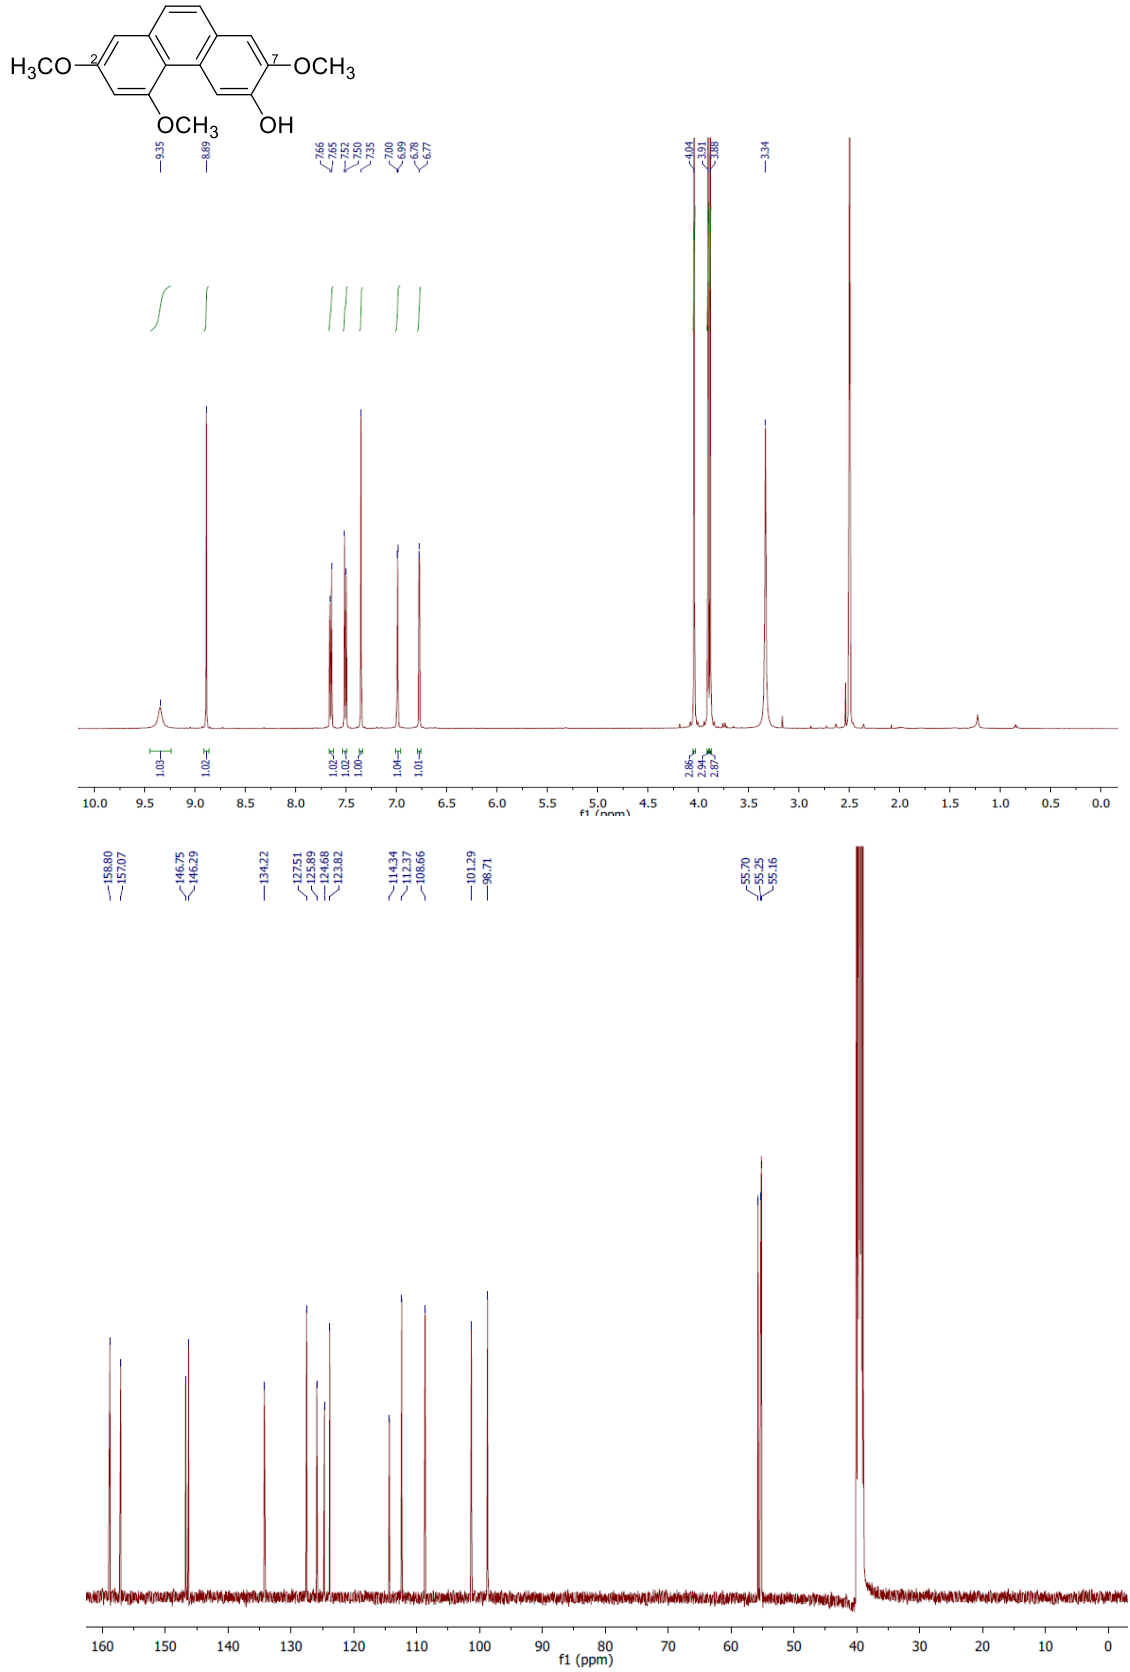

**Table S1.** DPPH radical scavenging activity of compounds **1-3**, DBP and DBF extracts.

| Sample                  | Concentration (mg/mL) | % Reduction  | IC <sub>50</sub> (mg/mL) |
|-------------------------|-----------------------|--------------|--------------------------|
| <i>L</i> -Ascorbic acid | 0.1000                | 91.35 ± 0.82 | 0.0431                   |
|                         | 0.0500                | 56.33 ± 1.24 |                          |
|                         | 0.0250                | 41.70 ± 3.75 |                          |
|                         | 0.0125                | 21.83 ± 1.44 |                          |
| <b>1</b>                | 0.1000                | 79.34 ± 6.28 | 0.0645                   |
|                         | 0.0500                | 34.93 ± 0.27 |                          |
|                         | 0.0250                | 22.14 ± 1.02 |                          |
|                         | 0.0125                | 7.34 ± 3.63  |                          |
| <b>2</b>                | 0.2500                | 83.54 ± 2.16 | 0.1543                   |
|                         | 0.1250                | 40.16 ± 4.74 |                          |
|                         | 0.0625                | 17.64 ± 2.59 |                          |
|                         | 0.0313                | 6.42 ± 1.02  |                          |
| <b>3</b>                | 1.0000                | 72.62 ± 6.02 | 0.5656                   |
|                         | 0.5000                | 57.95 ± 0.69 |                          |
|                         | 0.2500                | 35.76 ± 1.02 |                          |
|                         | 0.1250                | 7.95 ± 0.99  |                          |
| DBF                     | 10.000                | 61.22 ± 2.53 | 7.6758                   |
|                         | 5.000                 | 40.96 ± 4.13 |                          |
|                         | 2.500                 | 18.17 ± 4.32 |                          |
|                         | 1.250                 | 3.23 ± 3.42  |                          |
| DBP                     | 1.000                 | 52.31 ± 2.14 | 0.9441                   |
|                         | 0.500                 | 26.46 ± 6.33 |                          |
|                         | 0.250                 | 9.08 ± 1.64  |                          |
|                         | 0.125                 | 1.27 ± 1.25  |                          |

**Table S2.** ABTS+ radical scavenging activity of compounds **1-3**, DBP and DBF extracts.

| Sample                  | Concentration (mg/mL) | % Reduction  | IC <sub>50</sub> (mg/mL) |
|-------------------------|-----------------------|--------------|--------------------------|
| <i>L</i> -Ascorbic acid | 0.1000                | 91.80 ± 0.30 | 0.0499                   |
|                         | 0.0500                | 58.58 ± 7.62 |                          |
|                         | 0.0250                | 32.39 ± 4.67 |                          |
|                         | 0.0125                | 6.24 ± 4.99  |                          |
| <b>1</b>                | 0.1000                | 88.76 ± 1.04 | 0.0482                   |
|                         | 0.0500                | 64.35 ± 1.62 |                          |
|                         | 0.0250                | 29.68 ± 3.17 |                          |
|                         | 0.0125                | 12.55 ± 0.64 |                          |
| <b>2</b>                | 0.2000                | 56.76 ± 6.16 | 0.1534                   |
|                         | 0.1000                | 44.78 ± 3.72 |                          |
|                         | 0.0500                | 32.10 ± 2.79 |                          |
|                         | 0.0250                | 14.34 ± 0.68 |                          |
| <b>3</b>                | 1.0000                | 86.68 ± 0.57 | 0.2965                   |
|                         | 0.5000                | 79.98 ± 1.23 |                          |
|                         | 0.2500                | 40.83 ± 4.38 |                          |
|                         | 0.1250                | 34.87 ± 7.55 |                          |
| DBF                     | 10.000                | 92.27 ± 0.01 | 3.4269                   |
|                         | 5.000                 | 75.45 ± 1.44 |                          |
|                         | 2.500                 | 43.82 ± 3.34 |                          |
|                         | 1.250                 | 25.52 ± 2.16 |                          |
| DBP                     | 1.000                 | 64.41 ± 2.57 | 0.7708                   |
|                         | 0.500                 | 32.7 ± 1.81  |                          |
|                         | 0.250                 | 17.9 ± 0.58  |                          |
|                         | 0.125                 | 9.71 ± 2.33  |                          |
